# Supplementary material for: High-throughput engineering of a mammalian genome reveals building principles of methylation states at CG rich regions
Source: eLife journal article supplement (doi:10.7554/elife.04094), 2014-09-25
Supplement: supp [file elife-04094-supp-v1.zip]

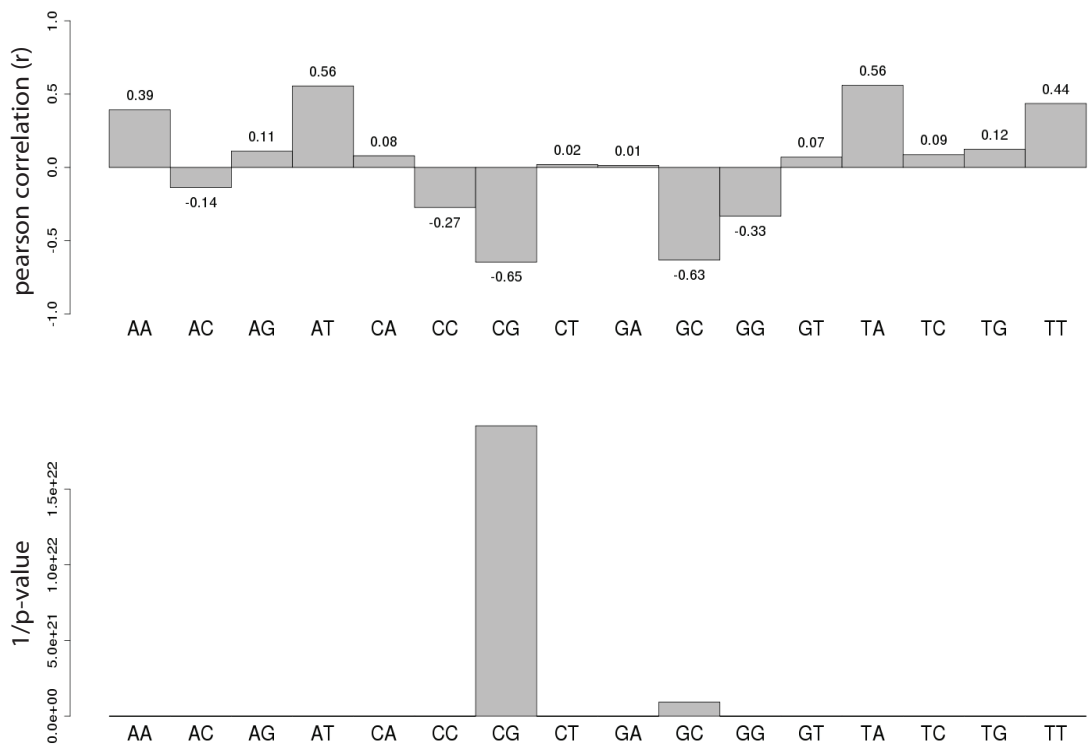

Figure 3-figure supplement 1:

Systematic analysis of the relationship between all dinucleotide frequency and methylation of the E.coli fragments. Shown are the pearson correlation (R – upper panel) and the 1/p-value (upper panel) of individual linear regression between fragment methylation levels and each dinucleotide.
